# Supplementary material for: Transport pathways of carbon monoxide from Indonesian fire pollution to a subtropical high-altitude mountain site in the western North Pacific
Source: Copernicus journal article supplement (doi:10.5194/acp-23-4727-2023), 2023-04-20
Supplement: Supplementary file 1 [file acp-23-4727-2023-supplement.pdf]

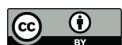

*Supplement of*

## **Transport pathways of carbon monoxide from Indonesian fire pollution to a subtropical high-altitude mountain site in the western North Pacific**

**Saginela Ravindra Babu et al.**

*Correspondence to:* S. Ravindra Babu (baburavindra595@gmail.com) and Neng-Huei Lin (nhlin@cc.ncu.edu.tw)

The copyright of individual parts of the supplement might differ from the article licence.

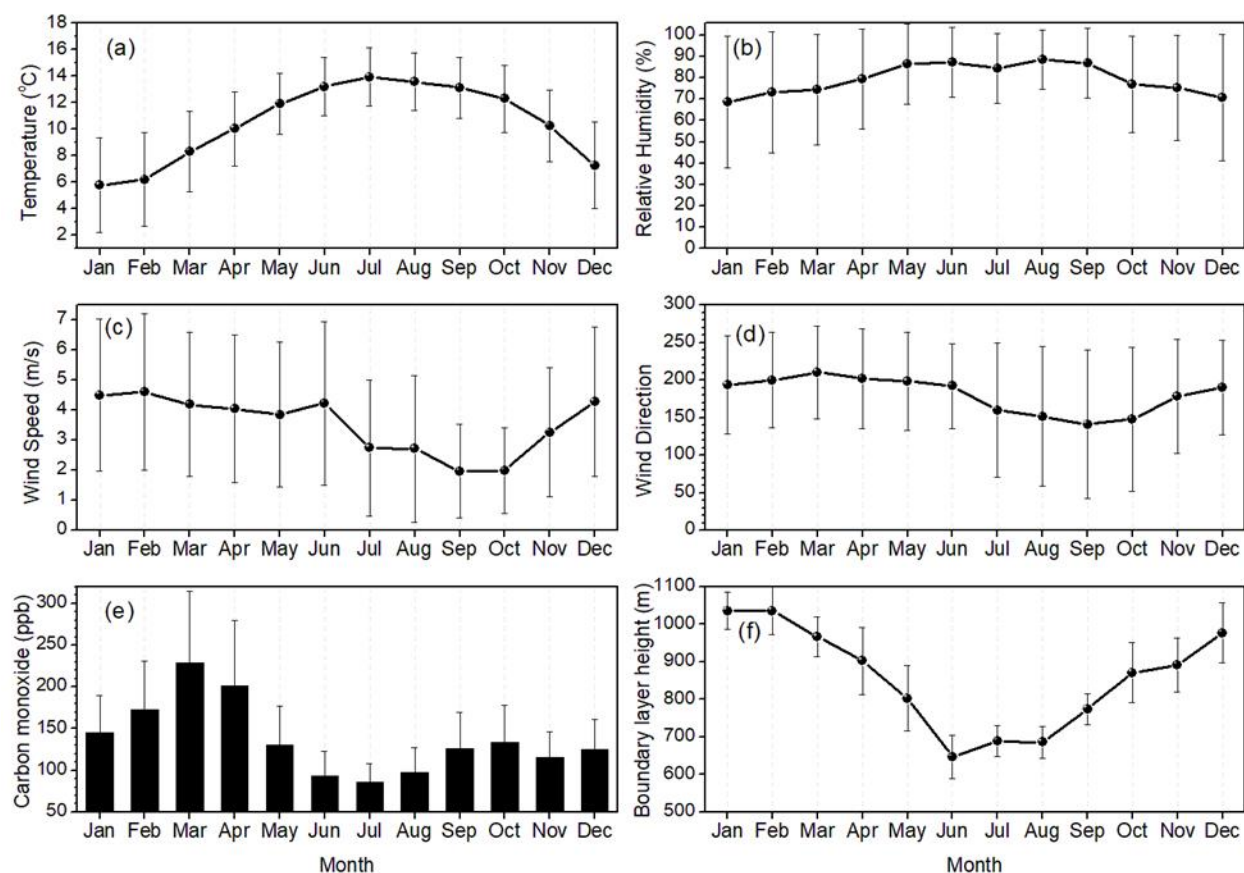

Figure S1. Long-term monthly mean of (a) temperature, (b) relative humidity, (c) wind speed, (d) wind direction, (e) carbon monoxide at LABS, and (f) MERRA-2 obtained boundary layer height around LABS between 2006 and 2021. Vertical error bars indicate the standard deviation from the monthly mean.

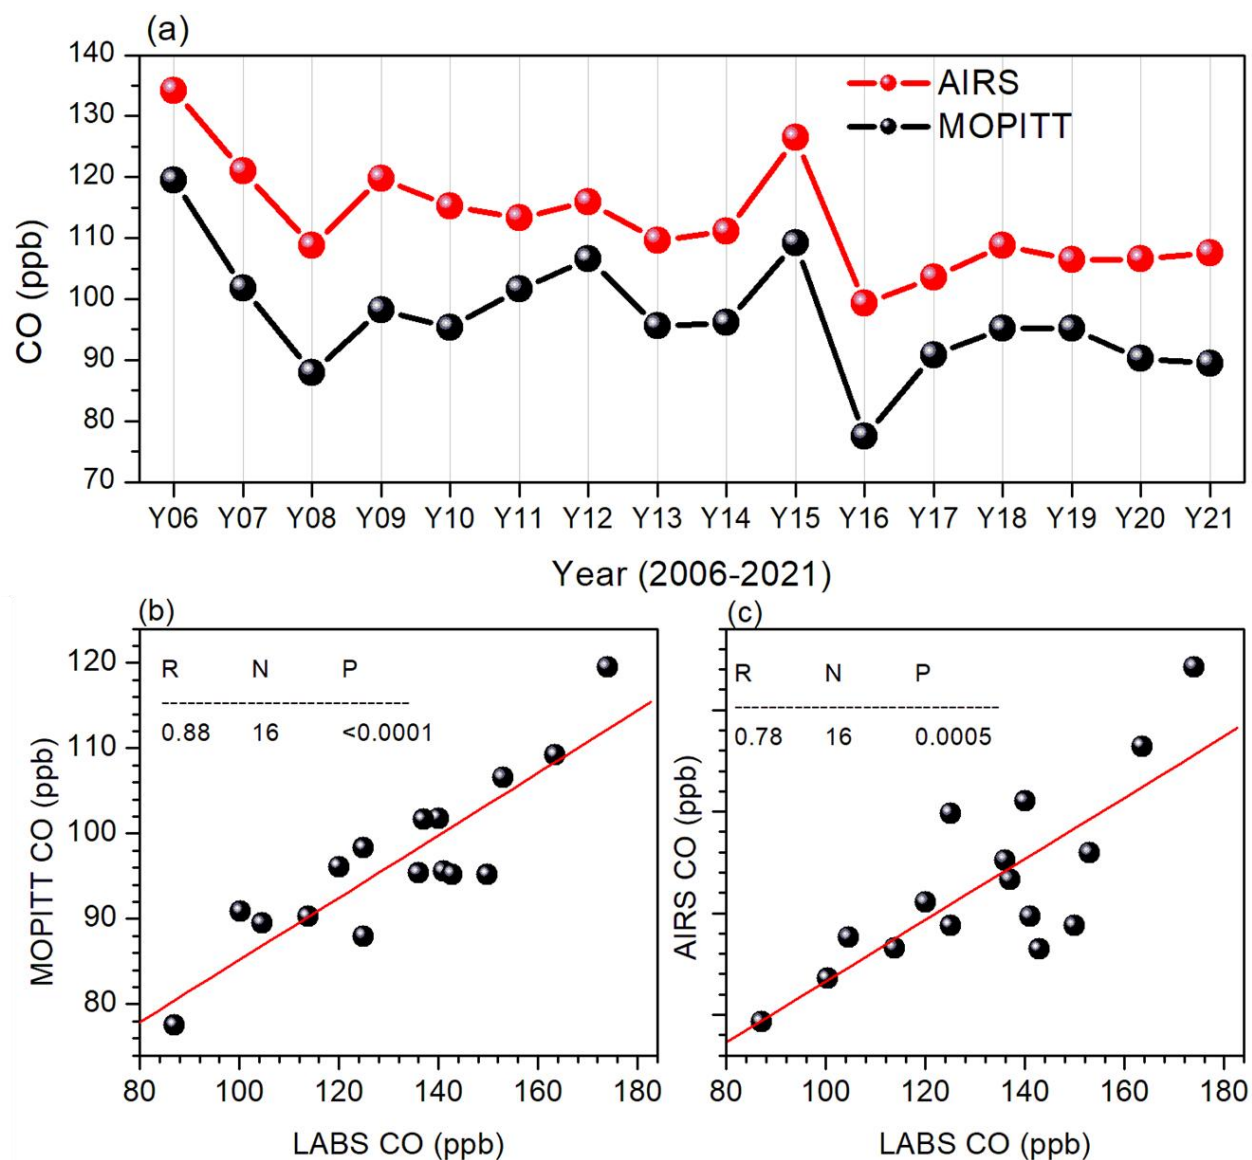

Figure S2. (a) MOPITT (black) and AIRS (red) satellites observed CO mixing ratios at 700 hPa within the 1-degree radius around the LABS location, (b) correlation plot between in-situ CO at LABS and MOPITT CO, and (c) correlation plot between in-situ CO at LABS and AIRS CO in October month during 2006 to 2021. (R is the correlation coefficient; N is the sample size; P is the significance value)

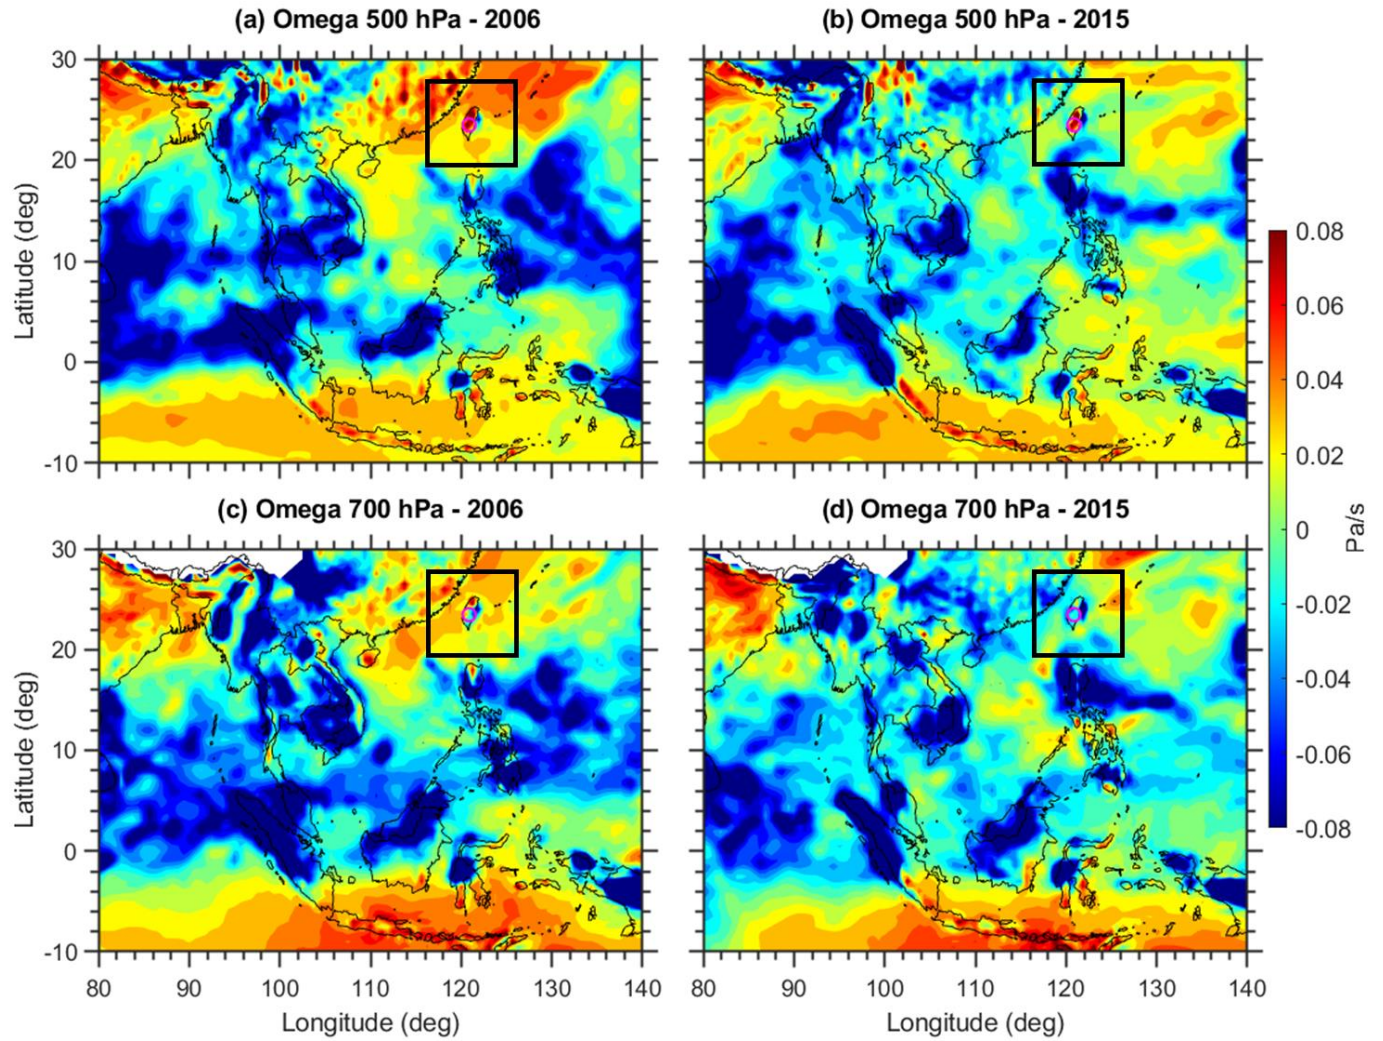

Figure S3. Monthly mean vertical pressure velocity obtained from MERRA-2 reanalysis (a) at 500 hPa and (b) at 700 hPa during October 2006. Subplots (c) and (d) are the same as subplots (a) and (b) but for October 2015.
